# Supplementary material for: The water soluble peripherally tetra-substituted zinc(ii), manganese(iii) and copper(ii) phthalocyanines as new potential anticancer agents
Source: Royal Society of Chemistry journal article supplement (doi:10.1039/c6dt02720b), 2016-01-01
Supplement: c6dt02720b1.pdf [file c6dt02720b1.pdf]

## SUPPLEMENTARY INFORMATION

# **The water soluble peripherally tetra-substituted zinc(II), manganese(III) and copper(II) phthalocyanines as new potential anticancer agents**

Burak Barut<sup>a</sup>, Ayşenur Sofuoğlu<sup>b</sup>, Zekeriya Biyiklioglu<sup>b\*</sup>, Arzu Özel<sup>a</sup>

*<sup>a</sup>Karadeniz Technical University, Faculty of Pharmacy, Department of Biochemistry,  
Trabzon, Turkey*

*<sup>b</sup>Karadeniz Technical University, Faculty of Science, Department of Chemistry,  
Trabzon, Turkey*

## **1. Materials**

2-(2-Morpholin-4-ylethoxy)ethanol [1] was prepared according to the literature procedures. All reagents and solvents were of reagent grade quality and were obtained from commercial suppliers. All solvents were dried and purified as described by Perrin and Armarego [2]. Acetic acid, agarose, ascorbic acid (AA), bromophenol blue, bovine serum albumin (BSA), calf thymus deoxyribonucleic acid (CT-DNA), ethylenediaminetetraacetate (EDTA), dithiothreitol (DTT), ethidium bromide (EB), glycerol, hydrogen peroxide (H<sub>2</sub>O<sub>2</sub>), hydrochloric acid (HCl), magnesium chloride (MgCl<sub>2</sub>), β-mercaptoethanol (ME), potassium chloride (KCl), sodium dodecyl sulfate (SDS), spermidine, trizma-base (Tris), xylene cyanol, were obtained from Sigma-Aldrich. Supercoiled pBR322 plasmid DNA and Topoisomerase I Human Assay Kit was purchased from Fermentas and Topogen.

### **1.2. Equipment**

The IR spectra were recorded on a Perkin Elmer 1600 FT-IR Spectrophotometer, using KBr pellets. <sup>1</sup>H and <sup>13</sup>C-NMR spectra were recorded on a Bruker Avance III 400 MHz spectrometers in CDCl<sub>3</sub>, DMSO-*d*<sub>6</sub> and chemical shifts were reported (δ) relative to Me<sub>4</sub>Si as internal standard. Mass spectra were measured on a Micromass Quatro LC/ULTIMA LC-MS/MS spectrometer. MALDI-MS of complexes were obtained in dihydroxybenzoic acid as MALDI matrix using nitrogen laser accumulating 50 laser shots using Bruker Microflex LT MALDI-TOF mass spectrometer (Bremen, Germany). Optical spectra in the UV-vis region were recorded with a Perkin Elmer Lambda 25 spectrophotometer. The elemental analyses were performed on a Costech ECS 4010 instrument. The DNA thermal denaturation

experiments were performed using Cary 100 Bio UV-Vis Spectrophotometer containing Varian Cary Temperature Controller Unit. Viscosity experiments were measured with Ostwald Viscometer at room temperature. Photocleavage experiments were performed using a General Electric quartz line lamp (300 W). 650 and 750 glasses cut off filters (Schott) were used for DNA photocleavage. To prevent ultraviolet and infrared radiations were used a water filter. Image of the DNA photocleavage and topoisomerase I inhibition experiments were photographed using BioRad Gel Doc XR system.

### ***1.3. DNA binding experiments***

#### ***1.3.1. Electronic absorption titration experiments***

The investigation of **2a**, **3a** and **4a** compounds with CT-DNA were studied using electronic absorption titration experiments to calculate the intrinsic binding constants ( $K_b$ ) to CT-DNA using Wolfe-Shimer equation and determine the binding modes to CT-DNA. For all of the experiments, the stock solutions of **2a**, **3a** and **4a** compounds were prepared in distilled water and stored at 25 °C. The stock solution of CT-DNA were prepared in buffer (5 mM Tris-HCl/50 mM NaCl (pH 7.2)) followed by stirring and kept at 4 °C for four days. UV absorbance ratio of the CT-DNA solution at 260 and 280 nm ( $A_{260}/A_{280}$ ) was 1.84, showing that the DNA solution was sufficiently free of protein due to in range of 1.8-1.9 ratios. The concentration of CT-DNA was measured with UV absorbance at 260 nm using the molar extinction coefficient ( $\epsilon$ ) of 6600 M<sup>-1</sup> cm<sup>-1</sup>. To determine the intrinsic binding constants of **2a**, **3a** and **4a** compounds with CT-DNA, the absorption titration spectra were recorded using 1 cm quartz cuvettes from 800 nm to 350 nm at room temperature. Absorption titration spectra of **2a**, **3a** and **4a** compounds (75  $\mu$ M) without CT-DNA were recorded and increasing

concentrations of CT-DNA (0-5  $\mu\text{M}$ ) were added to both cuvettes and allowed to keep for 10 min at room temperature and changes in the absorption spectrum were monitored.  $K_b$  of the **2a**, **3a** and **4a** compounds were measured using the following Wolfe-Shimer equation [3]:

$$\frac{[DNA]}{(\varepsilon_a - \varepsilon_f)} = \frac{[DNA]}{(\varepsilon_b - \varepsilon_f)} + \frac{1}{K_b(\varepsilon_b - \varepsilon_f)} \quad (\text{F. 1})$$

where [DNA] is the concentration of CT-DNA. The apparent absorption coefficient  $\varepsilon_a = A_{\text{obsd}}/[\text{Compound}]$ ,  $\varepsilon_f$  = the extinction coefficient of the free compound and  $\varepsilon_b$  = The extinction coefficient of the compound when fully bound to DNA, respectively. In plots of  $[DNA]/(\varepsilon_a - \varepsilon_f)$  versus [DNA],  $K_b$  is given by the ratio of slope to the intercept.

### **1.3.2. Competitive binding experiments**

Competitive binding experiments of **2a**, **3a** and **4a** compounds with EB were performed using UV-Vis spectroscopy to determine whether the intercalating effect of the compounds and their ability to displace EB from DNA-EB complex [4]. (EB-(CT-DNA)) complex was formed by adding 50  $\mu\text{M}$  EB to 50  $\mu\text{M}$  CT-DNA solution. Increasing the concentration of **2a**, **3a** and **4a** compounds (0-20  $\mu\text{M}$ ) were added to these complex and measured as the changes in the absorption spectra in the range of 435-520 nm.

### **1.3.3. Thermal denaturation experiments**

The DNA thermal denaturation experiments were performed by monitoring the absorbance of the CT-DNA (50  $\mu\text{M}$ ) and **2a**, **3a** and **4a** compounds (50  $\mu\text{M}$ ) in a 1:1 ratio in

buffer (5 mM Tris-HCl/50 mM NaCl at pH 7.2) heating from 50 to 100 °C at rate of 1 °C per 1 min, recording the UV absorbance at 260 nm every 0.5 °C. Consequently, thermal melting temperature ( $T_m$ ) values of CT-DNA and **2a**, **3a** and **4a** compounds were calculated automatically using thermal melting program [5].

#### **1.3.4. Viscosity experiments**

Viscosity experiments were carried out using Ostwald Viscometer at room temperature. The concentration of CT-DNA was 50  $\mu$ M, **2a**, **3a** and **4a** compounds and EB were ranging from 0 to 100  $\mu$ M in buffer (5 mM Tris-HCl/50 mM NaCl at pH 7.2). The flow times were measured three times with a digital timer and average flow time was calculated. The results were presented as  $(\eta/\eta_0)^{1/3}$  vs [compounds]/[DNA], where  $\eta$  is the viscosity of DNA in the presence of the **2a**, **3a** and **4a** compounds and EB, and  $\eta_0$  is the viscosity of DNA alone in buffer. Viscosity values were calculated from  $\eta = (t - t_0)$ , where  $t$  is the observed flow time, and  $t_0$  is the flow time of buffer [6].

#### **1.4. DNA-photocleavage experiments**

The photocleavage experiments of compounds were performed by agarose gel electrophoresis using supercoiled pBR322 plasmid DNA in the presence of irradiation at 650 nm for **2a**, **4a** compounds and 750 nm for **3a** compound. In this study, total volume of reaction mixture contained Tris-HCl buffer (pH 7.0), supercoiled plasmid pBR322 DNA (250 ng) and different concentrations (12.5  $\mu$ M, 25  $\mu$ M and 50  $\mu$ M) of **2a**, **3a** and **4a** compounds. Then irradiated 15 min at 650 and 750 nm using a General Electric quartz line lamp (300 W)

and various filters. The mixtures were incubated at 37 °C for 1 hour. After incubated, loading buffer (containing bromophenol blue, glycerol, SDS, xylene cyanol) was added the reaction mixture. The mixture was loaded on 0.8% agarose gel (1 mg/mL in TAE (Tris-acetate-EDTA)) with ethidium bromide staining and electrophoresis was performed at 100 V for 90 min and resulting image was photographed using BioRad Gel Doc XR system [7]. Also, DNA photocleavage experiments of compounds (25 µM) were carried out by adding oxidizing agents such as H<sub>2</sub>O<sub>2</sub>, 0.4 M; AA, 2.5 µM and ME, 0.4 M; using the agarose gel electrophoresis method as described above at irradiation of 650 and 750 nm [8].

### **1.5. Topoisomerase I inhibition**

The topoisomerase I inhibitory effects of **2a**, **3a** and **4a** compounds were carried out by using agarose gel electrophoresis. Total volume of reaction mixture contained 35 mM Tris-HCl (pH 8.0), 0.1 mg/mL BSA, 5 mM DTT, 72 mM KCl, 5 mM MgCl<sub>2</sub>, 2 mM spermidine, supercoiled pBR322 plasmid DNA (250 ng), 1 Unit topoisomerase I and different concentrations of **2a**, **3a** and **4a** compounds (12.5 µM, 25 µM, 50 µM). The reaction mixture was incubated at 37 °C for 30 min. After incubated, loading buffer (containing bromophenol blue, glycerol, sodium dodecyl sulfate, xylene cyanol) was added to the reaction mixture. These reaction mixture was loaded on 0.8% agarose gel (1 mg/mL in TAE (Tris-acetate-EDTA)) with ethidium bromide staining and electrophoresed at 45 V for 180 min and the image was photographed using BioRad Gel Doc XR system [9].

## References

- [1] Zimmerman RY, Preparation of 4,4'-(oxydi-2,1-ethanediyl)bismorpholine and (hydroxyethoxyethyl)morpholine. Eur. Pat. Appl., 716084.
- [2] Perrin DD, Armarego WLF, Purification of Laboratory Chemicals (2nd edn), Pergamon Press: Oxford, 1989.
- [3] Wolfe A, Shimer GH, Meehan T, Polycyclic aromatic hydrocarbons physically intercalate into duplex regions of denatured DNA. *Biochem* 1987;26:6392-6.
- [4] Fu X, Zhang J, Liu D, Gan Q, Gao H, Mao Z, Le X, Cu (II)-di-peptide complexes of 2-(4'-thiazoly)benzimidazole: Synthesis, DNA oxidative damage, antioxidant and in vitro antitumor activity. *J Inorg Biochem* 2015;143:77-87.
- [5] Pradeepa SM, Bhojya Naik HS, Vinay Kumar B, Indira Priyadarsini K, Barik A, Jayakumar S, Synthesis and characterization of cobalt(II), nickel(II) and copper(II)-based potential photosensitizers: Evaluation of their DNA binding profile, cleavage and photocytotoxicity. *Inorg Chim Acta* 2015;428:138-46.
- [6] Rabindra Reddy P, Shilpa A, Raju N, Raghavaiah P, Synthesis, structure, DNA binding and cleavage properties of ternary amino acid Schiff base-phen/bipy Cu(II) complexes. *J Inorg Biochem* 2011;105:1603-12.
- [7] Özel A, Barut B, Demirbaş Ü, Biyiklioğlu Z, Investigation of DNA binding, DNA photocleavage, topoisomerase I inhibition and antioxidant activities of water soluble titanium(IV) phthalocyanine compounds. *J Photochem Photobiol B: Biol* 2016;157:32-8.
- [8] Gup R, Gökçe C, Aktürk S, Copper (II) complexes with 4-hydroxyacetophenone-derived acylhydrazones: synthesis, characterization, DNA binding and cleavage properties. *Spectrochim Acta Part A: Mol Biomol Spect* 2015;134:484-92.

- [9] Ahmad M, Afzal M, Tabassum S, Kalinska B, Mrozinski J, Bharadwaj P, Synthesis and structure elucidation of a cobalt(II) complex as topoisomerase I inhibitor: In vitro DNA binding, nuclease and RBC hemolysis. *Eur J Med Chem* 2014;74:683-93.
